# Supplementary material for: The COVID-19 Pandemic Decreases Cardiorespiratory Fitness: A 3-Year Follow-Up Study in Industry
Source: MDPI journal article supplement (doi:10.3390/jcdd11010009), 2023-12-28

## Supplementary Figure S1

Upon examining the correlation between  $\text{VO}_2\text{max}$  measurements at baseline (BL) and after two months, we observed a correlation coefficient of 0.864 ( $p < 0.001$ ). Between the baseline and the three-year follow-up, the correlation was 0.830 ( $p < 0.001$ ). Presented here is a scatter plot showing  $\text{VO}_2\text{max}$  values at baseline and at the three-year follow-up.

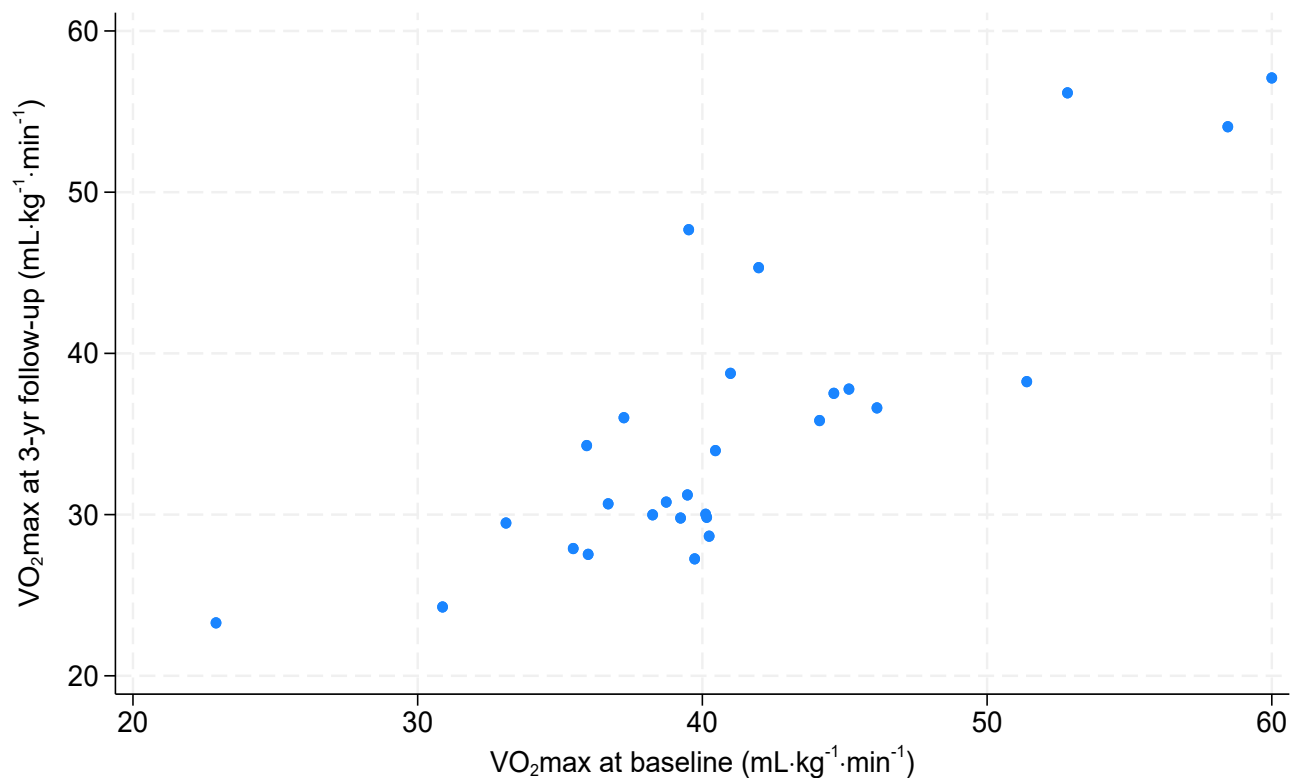

Supplement: s1 [file s1]
